# Supplementary material for: Plant Xyloglucan Xyloglucosyl Transferases and the Cell Wall Structure: Subtle but Significant
Source: PubMed Central journal article supplement (PMC7729885; doi:10.3390/molecules25235619), 2020-11-29
Supplement: molecules-25-05619-s001.pdf [file molecules-25-05619-s001.pdf]

**Supplementary Data Set S1.** The list of sequences of the GH16 family and their properties, such as tissue localisation and suggested function.

| Organism (plant/yeast)                | Gene name | Accession  | Tissue localisation                                  | Suggested function                                         | Reference            | Entry name used in Figure 2C |
|---------------------------------------|-----------|------------|------------------------------------------------------|------------------------------------------------------------|----------------------|------------------------------|
| <i>Arabidopsis thaliana</i>           | XTH3      | Q9LJR7     | Predominantly expressed in flower buds               | XET activity/ CW biogenesis                                | [121, 184]           | Q9LJR7 ARATH3                |
| <i>Arabidopsis thaliana</i>           | XTH31     | P93046     | Predominantly expressed in roots                     | XEH activity/ CW biogenesis                                | [184 - 187]          | P93046 AtXTH31               |
| <i>Hordeum vulgare</i>                | HVXE1     | P93671     | Predominantly expressed in first leaf base           | XET activity/ CW biogenesis                                | [124, 140, 152, 161] | P93671 HvXET3                |
| <i>Hordeum vulgare</i>                | HVXE2     | P93672     | Predominantly expressed in spike                     | XET activity/ CW biogenesis                                | [124, 140, 152, 161] | P93672 HvXET4                |
| <i>Hordeum vulgare</i>                | EXT       | P93668     | Protein isolated from 7-days-old seedlings           | XET activity/ CW biogenesis                                | [97, 188]            | P93668 HvXET5                |
| <i>Hordeum vulgare</i>                | XET6      | B1P1S7     | Predominantly expressed in flower at anthesis        | XET activity/ CW biogenesis                                | [120, 124]           | B1P1S7 HvXET6                |
| <i>Tropaeolum majus</i>               | N/A       | Q07524     | Expressed only in cotyledons                         | XEH activity/ CW biogenesis                                | [137, 159, 189]      | Q07524 2UWA NXG1             |
| <i>Tropaeolum majus</i>               | N/A       | 2UWC       | Expressed only in cotyledons                         | XEH activity/ CW biogenesis                                | [137, 189]           | 2UWC NXG2                    |
| <i>Tropaeolum majus</i>               | XET1      | Q41614     | Predominantly expressed in young epicotyls and roots | XET activity/ CW biogenesis                                | [159]                | Q41614 TmXET1                |
| <i>Tropaeolum majus</i>               | xet6.3    | V5ZEF7     | Protein found only in germinating seeds              | XET activity/ CW biogenesis                                | [122]                | V5ZEF7 TmXET6.3              |
| <i>Equisetum fluovatile</i>           | HTG       | A0A0K2WA62 | In shoots                                            | HTG activity/ CW biogenesis                                | [134, 135]           | A0A0K2WA62 EftHTG            |
| <i>Equisetum fluovatile</i>           | EfXTH-A   | MT495433*  | N/A                                                  | XET activity/ CW biogenesis                                | [116]                | EfXTH-A                      |
| <i>Equisetum fluovatile</i>           | EfXTH-H   | MT495434*  | N/A                                                  | XET activity/ CW biogenesis                                | [116]                | EfXTH-H                      |
| <i>Equisetum fluovatile</i>           | EfXTH-I   | MT495435*  | N/A                                                  | XET activity/ CW biogenesis                                | [116]                | EfXTH-I                      |
| <i>Populus tremulus x tremuloides</i> | XET16A    | Q8GZD5     | In vascular tissues                                  | XET activity/ CW biogenesis                                | [101, 126]           | Q8GZD5 PttXET16A             |
| <i>Pinus radiata</i>                  | XTH1      | A0A059SVJ4 | In stems (inclined)                                  | XET activity/ CW biogenesis                                | [155, 190]           | A0A059SVJ4 PrXET1            |
| <i>Saccharomyces cerevisiae</i>       | CRH1      | P53301     | Fungal CWs                                           | Transfer of chitin to 1,6- $\beta$ -glucan / CW biogenesis | [191 - 193]          | P53301 CRH1                  |
| <i>Saccharomyces cerevisiae</i>       | UTR2      | P32623     | Fungal CWs                                           | Transfer of chitin to 1,6- $\beta$ -glucan / CW biogenesis | [192 - 194]          | P32623 CRH2                  |

\*GenBank nucleotide sequence accession number (BankIt2345959)

N/A, not available.

**References**

184. Yokoyama, R.; Nishitani, K. A comprehensive expression analysis of all members of a gene family encoding cell-wall enzymes allowed us to predict cis-regulatory regions involved in cell-wall construction in specific organs of *Arabidopsis*. *Plant Cell Physiol.* 2001, 42, 1025–1033, doi:10.1093/pcp/pce154.
185. Aubert, D.; Herzog, M. A new cDNA encoding a xyloglucan endo-transglycosylase-related polypeptide (AtXTR8) preferentially expressed in seedling, root and stem of *Arabidopsis thaliana*. *Plant Sci.* 1996, 121, 187–196, doi:10.1016/S0168-9452(96)04522-0.
186. Zhu, X.F.; Shi, Y.Z.; Lei, G.J.; Fry, S.C.; Zhang, B.C.; Zhou, Y.H.; Braam, J.; Jiang, T.; Xu, X.Y.; Mao, C.Z.; et al. XTH31, encoding an in vitro XEH/XET-active enzyme, regulates aluminum sensitivity by modulating in vivo XET action, cell wall xyloglucan content, and aluminum binding capacity in *Arabidopsis*. *Plant Cell* 2012, 24, 4731–4747, doi:10.1105/tpc.112.106039.
187. Kaewthai, N.; Gendre, D.; Eklof, J.M.; Ibatullin, F.M.; Ezcurra, I.; Bhalerao, R.P.; Brumer, H. Group III-A XTH genes of *Arabidopsis* encode predominant xyloglucan endohydrolases that are dispensable for normal growth. *Plant Physiol.* 2013, 161, 440–454, doi:10.1104/pp.112.207308.
188. Smith, R.C.; Matthews, P.R.; Schunmann, P.H.D.; Chandler, P.M. The regulation of leaf elongation and xyloglucan endotransglycosylase by gibberellin in "Himalaya" barley (*Hordeum vulgare* L.). *J. Exp. Bot.* 1996, 47, 1395–1404, doi:10.1093/jxb/47.9.1395.
189. de Silva, J.; Jarman, S.; Arrowsmith, D.A.; Stronach, M.S.; Chengappa, S.; Sidebottom, C.; Reid, J.S.G. Molecular characterization of a xyloglucan-specific endo-(1-4)- $\beta$ -D-glucanase (xyloglucan endotransglycosylase) from nasturtium seeds. *Plant J.* 1993, 3, 701–711, doi:10.1046/j.1365-3113.1993.03050701.x.
190. Valenzuela, C.; Ramos, P.; Carrasco, C.; Moya-León, M.A.; Herrera, R. Cloning and characterization of a xyloglucan endo-transglycosylase/hydrolase gene expressed in response to inclination in radiata pine seedlings. *Tree Genet. Genomes* 2014, 10, 1305–1315, doi:10.1007/s11295-014-0762-9.
191. Arroyo, J.; Garcia-Gonzalez, M.; Garcia-Saez, M.I.; Sanchez-Perez, M.; Nombela, C. DNA sequence analysis of a 23,002 bp DNA fragment of the right arm of *Saccharomyces cerevisiae* chromosome VII. *Yeast* 1997, 13, 357–363, doi:10.1002/(SICI)1097-0061(19970330)13:4<357::AID-YEA77>3.0.CO;2-J.
192. Rodriguez-Peña, J.M.; Cid, V.J.; Arroyo, J.; Nombela, C. A novel family of cell wall-related proteins regulated differently during the yeast life cycle. *Mol. Cell Biol.* 2000, 20, 3245–3255, doi:10.1128/mcb.20.9.3245-3255.2000.
193. Cabib, E.; Blanco, N.; Grau, C.; Rodriguez-Pena, J.M.; Arroyo, J. Chh1p and Chh2p are required for the cross-linking of chitin to beta(1-6)glucan in the *Saccharomyces cerevisiae* cell wall. *Mol. Microbiol.* 2007, 63, 921–935, doi:10.1111/j.1365-2958.2006.05565.x.
194. Dietrich, F.S.; Mulligan, J.T.; Hennessy, K.M.; Yelton, M.A.; Allen, E.; Araujo, R.; Aviles, E.; Berno, A.; Brennan, T.; Carpenter, J.; et al. The nucleotide sequence of *Saccharomyces cerevisiae* chromosome V. *Nature* 1997
